# Supplementary material for: Specialization for rapid excitation in fast squid tentacle muscle involves action potentials absent in slow arm muscle
Source: Oxford University Press journal article supplement (doi:10.1242/jeb.218081), 2020-01-01
Supplement: jeb218081supp.pdf [file jeb218081supp.pdf]

**Table S1. Electrical properties of transverse muscle fibers from tentacles and arms**

**(Mean  $\pm$  SD and (range)).** Passive properties ( $R_m$ ,  $C_{in}$ , and  $R_s$ ) were determined as described elsewhere (Armstrong & Gilly, 1992).  $G_{max-slope}$  was estimated for  $G_{Na}$ , and  $G_{max-fit}$  was estimated for both  $G_{Na}$  and  $G_K$  as described in Methods. Significant differences between tentacle and arm fibers are indicated by asterisks (\* =  $p < 0.01$ ; 2-tailed T-test). All differences in  $G_{max}$  are highly significant (\*\* =  $p < 0.0001$ ). Differences in  $G_{max}$  for  $G_{Na}$  between 480Na//220Na and 460Na//300K are marginally significant in tentacle fibers ( $p = 0.049$ ), but they are significant for arm fibers ( $p < 0.01$ ). Differences in the four  $G_{Na}$  parameters for tentacle fibers determined with an inactivating-prepulse procedure vs. no prepulse were not significant ( $0.58 < p < 0.85$ ).

|                                                               | $R_{in}$<br>(Gohm) | $C_{in}$<br>(pF) | $R_s$<br>(Mohm) | $G_{max-slope}$<br>(nS/pF)                          | $G_{max-fit}$<br>(nS/pF)                             | $V_{1/2}$<br>(mV)                   | $k$<br>(mV)                    |
|---------------------------------------------------------------|--------------------|------------------|-----------------|-----------------------------------------------------|------------------------------------------------------|-------------------------------------|--------------------------------|
| <b>Tentacle <math>G_{Na}</math></b><br>480Na//220Na<br>(n=11) | $1.5 \pm 0.7$      | $11.7 \pm 3.7$   | $4.3 \pm 1.9$   | <b><math>1.8 \pm 0.5^{**}</math></b><br>(1.2 – 2.7) | <b><math>1.9 \pm 0.5^{**}</math></b><br>(1.3 – 2.6)  | $-10.7 \pm 2.6^*$<br>(-15.4 – -5.6) | $8.0 \pm 2.0$<br>(6.3 – 12.6)  |
| 460Na//300K<br>(n=19)                                         | $0.7 \pm 0.6$      | $15.4 \pm 7.1$   | $3.7 \pm 2.4$   | <b><math>2.6 \pm 1.1^{**}</math></b><br>(1.5 – 4.8) | <b><math>2.6 \pm 1.1^{**}</math></b><br>(1.5 – 5.0)  | $-1.2 \pm 6.1$<br>(-11.2 – 9.9)     | $8.0 \pm 1.2$<br>(6.4 – 11.6)  |
| Overall<br>(n=30)                                             | $1.1 \pm 0.8$      | $13.5 \pm 5.7$   | $3.9 \pm 2.3$   | <b><math>2.3 \pm 0.9^{**}</math></b>                | <b><math>2.4 \pm 0.9^{**}</math></b>                 | $-4.6 \pm 6.4.7$                    | $8.0 \pm 1.6$                  |
| <b>Arm <math>G_{Na}</math></b><br>480Na//220Na<br>(n=6)       | $2.2 \pm 1.1$      | $10.8 \pm 2.1$   | $6.7 \pm 3.1$   | $0.3 \pm 0.1$<br>(0.2 – 0.5)                        | $0.3 \pm 0.1$<br>(0.2 – 0.5)                         | $-15.5 \pm 3.2$<br>(-21.0 – -11.1)  | $6.8 \pm 1.0$<br>(5.8 – 8.6)   |
| 460Na//300K<br>(n=13)                                         | $0.8 \pm 0.4$      | $14.0 \pm 7.1$   | $4.6 \pm 2.5$   | $0.1 \pm 0.2$<br>(0.0 – 0.4)                        | $0.1 \pm 0.2$<br>(0.0 – 0.4)                         | $-2.3 \pm 3.3$<br>(-9.6 – 1.5)      | $7.0 \pm 2.8$<br>(4.3 – 11.1)  |
| Overall<br>(n=19)                                             | $1.3 \pm 0.9$      | $13.0 \pm 6.1$   | $5.20 \pm 2.8$  | $0.2 \pm 0.2$                                       | $0.2 \pm 0.2$                                        | $-8.0 \pm 7.5$                      | $6.9 \pm 2.2$                  |
| <b>Tentacle <math>G_K</math></b><br>(n=13)                    | $0.7 \pm 0.6$      | $16.0 \pm 7.0$   | $3.5 \pm 2.7$   |                                                     | <b><math>7.4 \pm 2.4^{**}</math></b><br>(4.4 – 12.5) | $-8.5 \pm 5.9$<br>(-19.6 – 0.3)     | $7.5 \pm 1.2^*$<br>(5.6 – 9.3) |
| <b>Arm <math>G_K</math></b><br>(n=12)                         | $0.8 \pm 0.4$      | $13.9 \pm 7.4$   | $4.8 \pm 2.5$   |                                                     | $2.5 \pm 1.1$<br>(0.6 – 4.1)                         | $-11.9 \pm 7.0$<br>(-25.6 – -0.1)   | $9.3 \pm 1.3$<br>(7.7 – 12.2)  |

**Table S2. Kinetic properties of  $I_{Na}$  recorded in tentacle transverse muscle fibers [means  $\pm$  SD (n)] and in giant fiber lobe neurons from the same species of squid (*Doryteuthis opalescens*). See**

Methods for details. Values for giant fiber lobe neurons (GFL, n=2) were obtained by graphical analysis of plots used in conjunction with preparation of a previously publishes study (Gilly et al., 1997). GFL neuron codes are 04SEP93P.GFL and 21MY92G.GFL. Recording condition (temperature and solutions) were essentially identical to those used in the present study for tentacle muscle fibers. Values for  $\tau$  ON were determined by fitting a single exponential between cursors placed at time of peak  $I_{Na}$  and at the time of 0.75 peak  $I_{Na}$  (i.e., the final 25% of the rise of  $I_{Na}$  to the peak was fitted). Values for  $\tau$  inactivation were determined in a similar manner with cursors positioned after the time of peak  $I_{Na}$  and after return of  $I_{Na}$  to the zero baseline. Fitting was carried out using the standard exponential fitting routine of Clampfit 9.0 employing a sum-of-squared-errors minimization method and a 4 point Chebyshev smoothing filter.

| V   | $t_{1/2}$ ON           |       | $\tau$ ON              |       | $\tau$ inactivation    |       |
|-----|------------------------|-------|------------------------|-------|------------------------|-------|
|     | Tentacle               | GFL   | Tentacle               | GFL   | Tentacle               | GFL   |
| -20 | 0.580 $\pm$ 0.056 (10) | 0.602 | 0.137 $\pm$ 0.056 (10) | 0.104 | 1.276 $\pm$ 0.260 (10) | 1.950 |
| -10 | 0.510 $\pm$ 0.053 (6)  | 0.500 | 0.088 $\pm$ 0.018 (6)  | 0.098 | 0.948 $\pm$ 0.121 (6)  | 1.225 |
| 0   | 0.426 $\pm$ 0.047 (6)  | 0.393 | 0.078 $\pm$ 0.042 (6)  | .078  | 0.790 $\pm$ 0.130 (6)  | 0.900 |
| 10  | 0.457 $\pm$ 0.42 (6)   | 0.352 | 0.053 $\pm$ 0.014 (4)  | .062  | 0.612 $\pm$ 0.124 (6)  | 0.750 |
| 20  |                        | 0.315 |                        | 0.45  |                        | 0.600 |
| 30  | 0.244 $\pm$ 0.048 (10) |       | 0.0410 $\pm$ 0.011 (9) | .054  | 0.372 $\pm$ 0.096 (10) | 0.550 |
| 40  | 0.257 $\pm$ 0.060 (6)  | 0.305 | 0.045 $\pm$ 0.007 (6)  | 0.044 | 0.365 $\pm$ 0.0422 (6) | 0.525 |
| 50  | 0.256 $\pm$ 0.058 (6)  | .0270 | 0.041 $\pm$ 0.007 (6)  | 0.395 | 0.333 $\pm$ 0.018 (6)  | 0.475 |

**Table S3. Kinetic properties of voltage-dependent K conductance ( $G_K$ ) in transverse muscle fibers of tentacle vs. arm.  $V_m$  is membrane potential after correcting  $V_p$  ( $= +10$  mV) for series-resistance error estimated at the time of peak  $I_K$  (See Methods). Half-time to peak  $I_K$  ( $t_{1/2}$ ) and time constant of final 25% ( $\tau_{ON}$ ) were measured as defined in same manner as for measuring properties of  $I_{Na}$  (Fig. 4). Activating pulses were 20 or 50 ms long from a holding potential of  $-70$  or  $-80$  mV. The time constant of deactivation ( $\tau_{OFF}$ ) was measured at  $-70$  mV. Only values of  $\tau_{ON}$  in tentacle and arm fibers are significantly different at  $p < 0.01^*$ . Values for the tentacle fiber discussed in conjunction with Fig. 6 (AUG1117C\*) are included to indicate that measurements made in the absence (No TTX) and presence of TTX (+TTX) are in general agreement. These values are not included in the mean, because the activating pulse was only 10 ms long.**

|                                       | $V_p$<br>(mV) | $V_m$<br>(mV) | $t_{1/2}$<br>(ms) | $\tau_{ON}$<br>(ms) | $\tau_{OFF}$<br>(-70 mV) |
|---------------------------------------|---------------|---------------|-------------------|---------------------|--------------------------|
| <b>Tentacle</b>                       |               |               |                   |                     |                          |
| AUG1117C* No TTX                      | 10            | 2.3           | 2.56              | 2.22                | 3.12                     |
| AUG1117C* TTX                         | 10            | 0.8           | 3.02              | 2.28                |                          |
| AUG0817A                              | 10            | 1.2           | 3.15              | 3.10                | 4.14                     |
| JUL2017C                              | 10            | 1.1           | 2.54              | 3.58                | 7.72                     |
| JUL2817B                              | 10            | 1.0           | 2.75              | 3.71                | 5.40                     |
| <b>Mean <math>\pm</math> SD (n=3)</b> |               | $1.1 \pm 0.1$ | $2.81 \pm 0.31$   | $3.46 \pm 0.32$     | $5.74 \pm 1.81$          |
|                                       |               |               |                   |                     |                          |
| <b>Arm</b>                            |               |               |                   |                     |                          |
| JUL1917A                              | 10            | 0.8           | 1.94              | 0.97                | 3.72                     |
| JUL1917C                              | 10            | 6.0           | 1.83              | 0.94                | 3.13                     |
| JUL1917D                              | 10            | 5.2           | 2.04              | 1.32                | 3.71                     |
| JUL3117A                              | 10            | 7.8           | 3.43              | 2.18                | 7.34                     |
| JUL3117B                              | 10            | 7.7           | 3.15              | 2.00                | 5.03                     |
| AUG3017A                              | 10            | 7.4           | 1.57              | 0.65                | 2.23                     |
| AUG3017B                              | 10            | 6.4           | 1.66              | 0.70                | 1.91                     |
| SEP0217A                              | 10            | 3.3           | 1.76              | 1.64                |                          |
| SEP0217C                              | 10            | 4.4           | 1.90              | 2.83                |                          |
| <b>Mean <math>\pm</math> SD (n=9)</b> |               | $5.4 \pm 2.3$ | $2.14 \pm 0.67$   | $1.47 \pm 0.75$     | $3.87 \pm 1.85$          |
| <b>p</b>                              |               | 0.011         | 0.133             | <b>0.0014*</b>      | 0.176                    |

**Table S4. Properties of action potentials and values of  $G_{\text{max-fit}}$  for  $G_{\text{Na}}$  of individual transverse muscle fibers.** RP is the resting set manually.  $V_{\text{peak}}$  is voltage at the peak of the action potential, or in the case of arm fibers where the estimate of dV/dt Rise was made.  $G_{\text{max-fit}}$  was determined as described in Methods. dV/dt Rise\* is dV/dt Rise corrected for the effect of the depolarizing current pulse (See Methods). It was not possible to measure  $G_{\text{Na}}$  in fiber AUG3117X\*, because a high series resistance of the pipette prevented adequate voltage control. The number in parenthesis indicates the number of measurement series made.

| Cell            | $R_{\text{in}}$<br>(mV) | RP<br>(mV) | $V_{\text{peak}}$<br>(mV) | $G_{\text{max-fit}}$<br>(ns/pF) | dV/dt<br>Rise<br>(mV/ms) | dV/dt<br>Rise*<br>(mV/ms) | dVdt<br>Fall<br>mV/ms) |
|-----------------|-------------------------|------------|---------------------------|---------------------------------|--------------------------|---------------------------|------------------------|
| <b>Tentacle</b> |                         |            |                           |                                 |                          |                           |                        |
| AUG0817A (2)    | 260.0                   | -80.5      | 44.0                      | 5.04                            | 106.89                   | 70.20                     | -135.31                |
| AUG3117C (2)    | 116.0                   | -68.0      | 38.1                      | 2.46                            | 79.14                    | 66.56                     | -77.13                 |
| AUG3117A (2)    | 423.9                   | -68.7      | 44.5                      | 3.41                            | 77.17                    | 58.37                     | -77.62                 |
| AUG3117B (4)    | 165.1                   | -69.9      | 39.6                      | 1.63                            | 80.23                    | 68.63                     | -106.12                |
| AUG3117X* (3)   | 859.5                   | -69.8      | 9.7                       |                                 | 49.28                    | 27.14                     | -55.49                 |
| MAY1918B (2)    | 420.2                   | -79.5      | 27.2                      | 1.67                            | 38.62                    | 10.38                     | -29.12                 |
| MAY1918C (1)    | 317.6                   | -83.5      | 37.6                      | 3.02                            | 49.64                    | 27.97                     | -43.77                 |
| MAY1918D (2)    | 418.9                   | -69.5      | 40.1                      | 2.94                            | 56.92                    | 44.55                     | -48.10                 |
| AUG0817B (1)    | 1729.4                  | -77.0      | 22.1                      | 1.50                            | 47.04                    | 6.65                      | -55.95                 |
| <b>Arm</b>      |                         |            |                           |                                 |                          |                           |                        |
| SEP0217A (1)    | 1526.0                  | -68.4      | 44.5                      | 0.19                            | 29.13                    | 0.51                      | -17.55                 |
| SEP0217C (1)    | 358.9                   | -66.0      | 38.6                      | 0.00                            | 16.85                    | 0.00                      | -5.67                  |
| MAY1918A (1)    | 361.1                   | -83.8      | 41.8                      | 0.00                            | 25.93                    | 1.73                      | -16.00                 |
| MAY1818A (1)    | 1157.0                  | -71.1      | 50.8                      | 0.32                            | 36.52                    | 0.51                      | -5.79                  |
